# Supplementary material
Source: Springer Nature journal article supplement (https://www.springermedizin.de/resource/supplementary/12958_2010_815_MOESM2_ESM.pdf/9568916)
Supplement: MOESM2 [file 9568916]

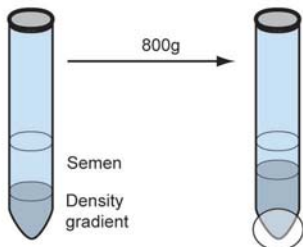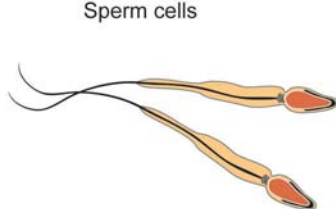

Wash seminal fluid (density gradient)

Protein extraction

7M Urea 2M ThioU  
1% CHAPS 10mM DTT

Crude extracts

2-D PAGE

1-D SDS-PAGE

DIGEST  
Peptides

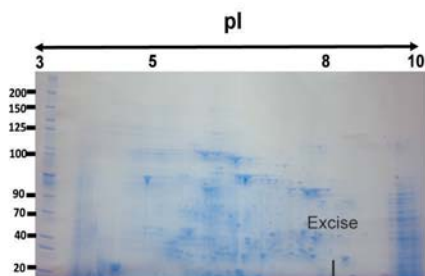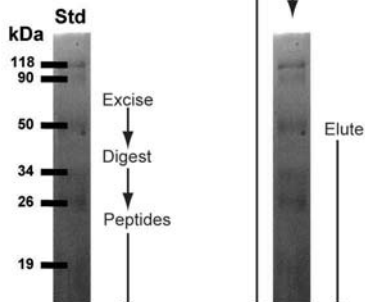

Digest

LC  
(HPLC Reverse-phase separation)

MS (MALDI-TOF)

MS/MS

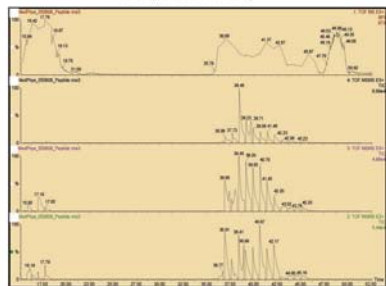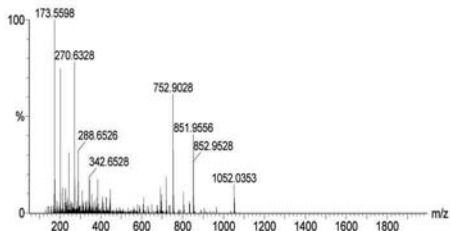

Representative MS/MS spectrum of a peptide

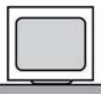

Database search  
Protein identification
